# Supplementary material for: Rapid, sensitive, and user-friendly detection of Pseudomonas aeruginosa using the RPA/CRISPR/Cas12a system
Source: Springer Nature journal article supplement (doi:10.1186/s12879-024-09348-3), 2024-04-30
Supplement: MOESM1 [file 27043618]

# Rapid, Sensitive, and User-Friendly Detection of *Pseudomonas aeruginosa* Using the RPA/CRISPR/Cas12a System

Wenjing Zhang<sup>1\*</sup>, Hai Qu<sup>2</sup>, Xin Wu<sup>1</sup>, Jingjing Shi<sup>3</sup>, Xinling Wang<sup>3\*</sup>

## Supplementary materials

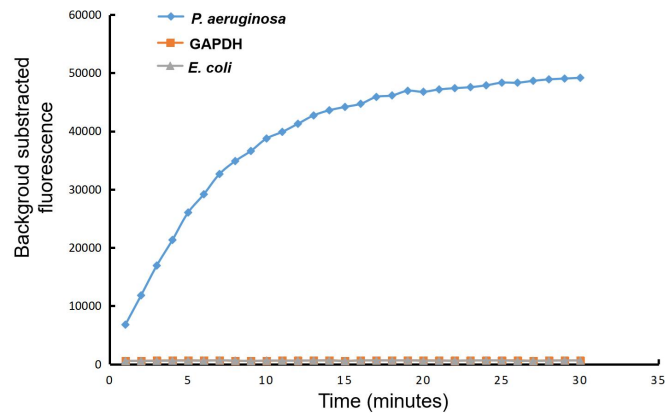

Figure S1 The fluorescence curves generated by CRISPR/Cas12a detection reaction. *P. aeruginosa*: Cas12a Protein + crRNA1 + Reporter + *P. aeruginosa* (the amplification of *P. aeruginosa* DNA using RPA); GAPDH: Cas12a Protein + crRNA1 + Reporter + GAPDH (the amplification of non-*P. aeruginosa* DNA (GAPDH gene) using PCR); *E. coli*: Cas12a Protein + crRNA1 + Reporter + *E. coli* (the amplification of non-*P. aeruginosa* DNA (*E. coli*) using RPA).

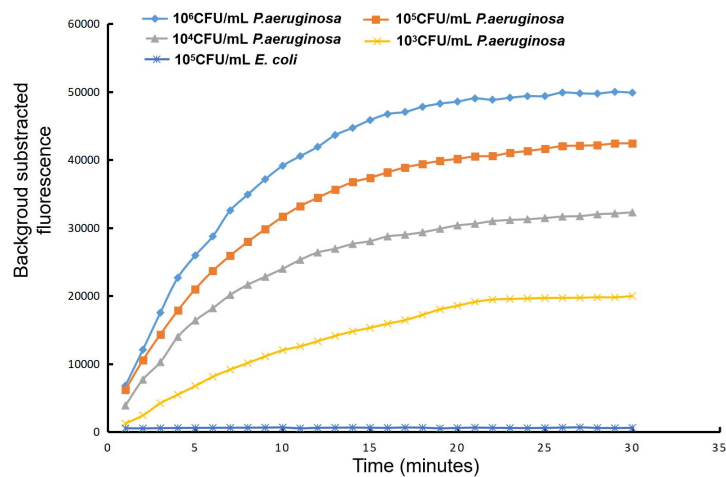

Figure S2 The fluorescence curves of different bacterial concentration generated by

CRISPR/Cas12a detection reaction.  $10^6$ CFU/mL *P. aeruginosa*,  $10^5$ CFU/mL *P. aeruginosa*,  $10^4$ CFU/mL *P. aeruginosa*, and  $10^3$ CFU/mL *P. aeruginosa* represent the fluorescence values obtained from *P. aeruginosa* at the concentration of  $10^6$  CFU/mL,  $10^5$  CFU/mL,  $10^4$  CFU/mL, and  $10^3$  CFU/mL;  $10^5$  CFU/mL *E. coli*: the fluorescence values obtained from *E. coli* with the concentration of  $10^5$  CFU/mL.

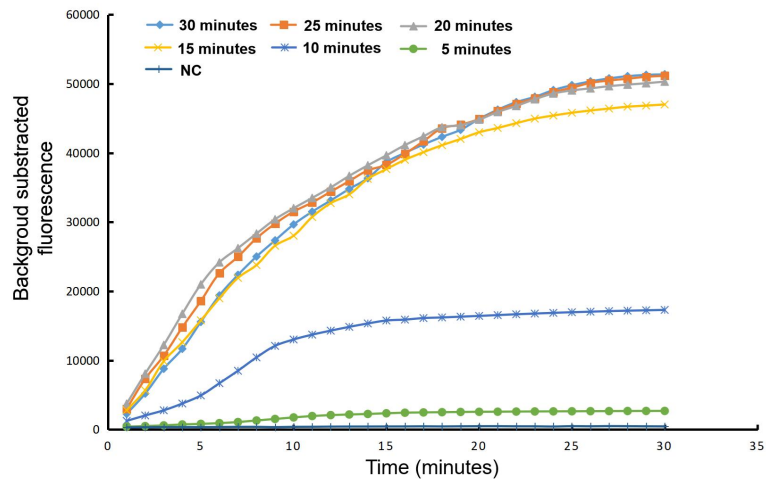

Figure S3 The fluorescence curves generated by *P. aeruginosa* DNA amplification across various time intervals detected using the CRISPR/Cas12a system. 5minutes, 10minutes, 15minutes, 20minutes, 25minutes, and 30 minutes represent the fluorescence intensities corresponding to different durations of RPA amplification (5, 10, 15, 20, 25, and 30 minutes) for *P. aeruginosa* DNA (DNA from bacterial with a concentration of  $1 \times 10^5$  CFU/mL); NC: ddH<sub>2</sub>O negative control.

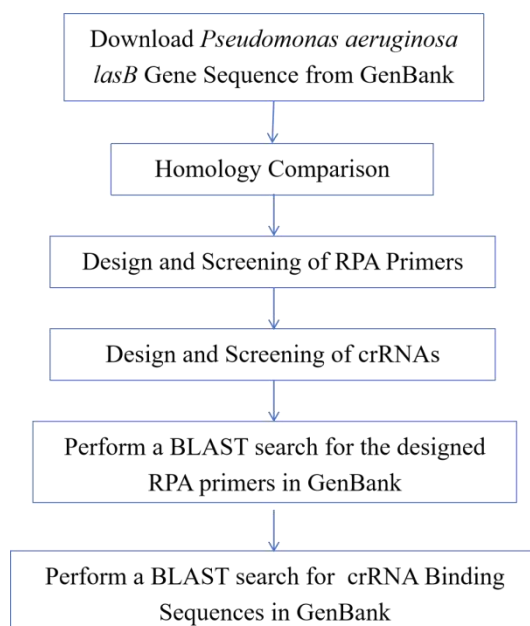

Figure S4 Flowchart of the step-by-step process used for designing RPA primers and crRNAs.

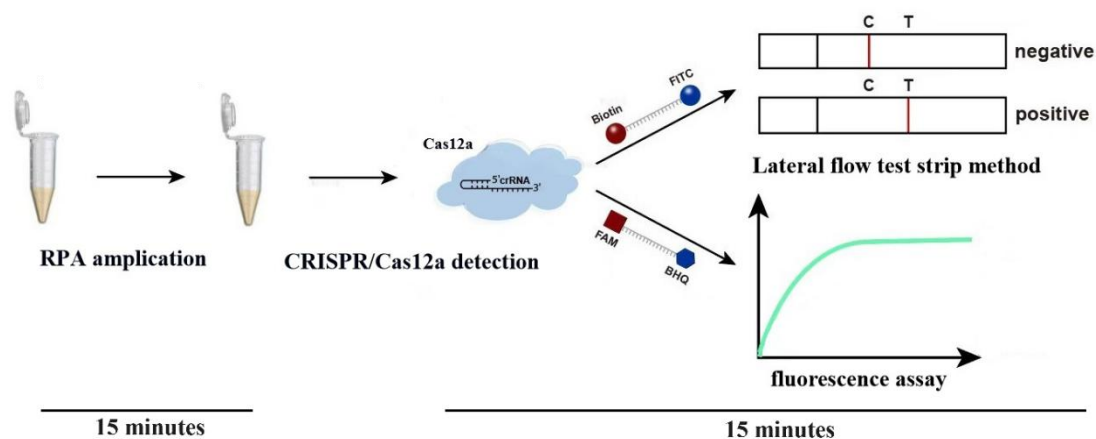

Figure S5 Illustrative diagram of the experiment process and the timeline of each step.

Table S1 Comparison between RPA/CRISPR/Cas12a detection platform and qPCR for *P. aeruginosa* detection in food samples.

| Methods            | Positive | Negative | Comparison between fluorescence assay and qPCR |                 | Comparison between LFTS method and qPCR |                 |
|--------------------|----------|----------|------------------------------------------------|-----------------|-----------------------------------------|-----------------|
|                    |          |          | Sensitivity (%)                                | Specificity (%) | Sensitivity (%)                         | Specificity (%) |
| Fluorescence assay | 15       | 135      | 93.75                                          | 100             |                                         |                 |
| LFTS method        | 13       | 137      |                                                |                 | 81.25                                   | 100             |
| qPCR               | 16       | 134      |                                                |                 |                                         |                 |

Table S2 The detection results of food samples using RPA/CRISPR/Cas12a detection platform and qPCR

| Sample number | Fluorescence assay  |     | LFTS Method detection |     | qPCR      |     |
|---------------|---------------------|-----|-----------------------|-----|-----------|-----|
|               | Fluorescence values | +/- |                       | +/- | Ct values | +/- |
| P-1           | 386                 | -   |                       | -   | No Ct     | -   |
| P-2           | 415                 | -   |                       | -   | No Ct     | -   |
| P-3           | 432                 | -   |                       | -   | No Ct     | -   |
| P-4           | 397                 | -   |                       | -   | No Ct     | -   |
| P-5           | 449                 | -   |                       | -   | No Ct     | -   |
| P-6           | 362                 | -   |                       | -   | No Ct     | -   |
| P-7           | 395                 | -   |                       | -   | No Ct     | -   |
| P-8           | 29136               | +   |                       | +   | 25.4      | +   |
| P-9           | 496                 | -   |                       | -   | No Ct     | -   |
| P-10          | 460                 | -   |                       | -   | No Ct     | -   |
| P-11          | 397                 | -   |                       | -   | No Ct     | -   |
| P-12          | 27632               | +   |                       | +   | 26.1      | +   |
| P-13          | 501                 | -   |                       | -   | No Ct     | -   |
| P-14          | 468                 | -   |                       | -   | No Ct     | -   |
| P-15          | 372                 | -   |                       | -   | No Ct     | -   |
| P-16          | 494                 | -   |                       | -   | No Ct     | -   |
| P-17          | 563                 | -   |                       | -   | No Ct     | -   |
| P-18          | 446                 | -   |                       | -   | No Ct     | -   |
| P-19          | 523                 | -   |                       | -   | No Ct     | -   |
| P-20          | 441                 | -   |                       | -   | No Ct     | -   |
| P-21          | 367                 | -   |                       | -   | No Ct     | -   |
| P-22          | 582                 | -   |                       | -   | No Ct     | -   |
| P-23          | 8976                | +   |                       | -   | 33.9      | +   |
| P-24          | 386                 | -   |                       | -   | No Ct     | -   |
| P-25          | 438                 | -   |                       | -   | No Ct     | -   |
| P-26          | 519                 | -   |                       | -   | No Ct     | -   |
| P-27          | 388                 | -   |                       | -   | No Ct     | -   |
| P-28          | 463                 | -   |                       | -   | No Ct     | -   |
| P-29          | 433                 | -   |                       | -   | No Ct     | -   |
| P-30          | 31057               | +   |                       | +   | 24.5      | +   |
| P-31          | 446                 | -   |                       | -   | No Ct     | -   |
| P-32          | 506                 | -   |                       | -   | No Ct     | -   |
| P-33          | 462                 | -   |                       | -   | No Ct     | -   |
| P-34          | 384                 | -   |                       | -   | No Ct     | -   |
| P-35          | 426                 | -   |                       | -   | No Ct     | -   |
| C-1           | 524                 | -   |                       | -   | No Ct     | -   |
| C-2           | 498                 | -   |                       | -   | No Ct     | -   |
| C-3           | 514                 | -   |                       | -   | No Ct     | -   |
| C-4           | 531                 | -   |                       | -   | No Ct     | -   |

|      |       |   |   |       |   |
|------|-------|---|---|-------|---|
| C-5  | 25439 | + | + | 26.6  | + |
| C-6  | 473   | - | - | No Ct | - |
| C-7  | 416   | - | - | No Ct | - |
| C-8  | 498   | - | - | No Ct | - |
| C-9  | 15693 | + | + | 28.8  | + |
| C-10 | 18961 | + | + | 28.3  | + |
| C-11 | 519   | - | - | No Ct | - |
| C-12 | 318   | - | - | No Ct | - |
| C-13 | 483   | - | - | No Ct | - |
| C-14 | 429   | - | - | No Ct | - |
| C-15 | 13846 | + | + | 29.3  | + |
| C-16 | 466   | - | - | No Ct | - |
| C-17 | 410   | - | - | No Ct | - |
| C-18 | 392   | - | - | No Ct | - |
| C-19 | 499   | - | - | No Ct | - |
| C-20 | 21389 | + | + | 27.5  | + |
| C-21 | 539   | - | - | No Ct | - |
| C-22 | 413   | - | - | No Ct | - |
| C-23 | 444   | - | - | No Ct | - |
| C-24 | 514   | - | - | 34.9  | + |
| C-25 | 21018 | + | + | 27.7  | + |
| C-26 | 542   | - | - | No Ct | - |
| C-27 | 460   | - | - | No Ct | - |
| C-28 | 448   | - | - | No Ct | - |
| C-29 | 419   | - | - | No Ct | - |
| C-30 | 25893 | + | + | 26.3  | + |
| C-31 | 490   | - | - | No Ct | - |
| C-32 | 449   | - | - | No Ct | - |
| C-33 | 517   | - | - | No Ct | - |
| C-34 | 536   | - | - | No Ct | - |
| C-35 | 459   | - | - | No Ct | - |
| C-36 | 504   | - | - | No Ct | - |
| C-37 | 19037 | + | + | 28.0  | + |
| C-38 | 382   | - | - | No Ct | - |
| C-39 | 493   | - | - | No Ct | - |
| C-40 | 463   | - | - | No Ct | - |
| C-41 | 491   | - | - | No Ct | - |
| C-42 | 509   | - | - | No Ct | - |
| C-43 | 441   | - | - | No Ct | - |
| C-44 | 439   | - | - | No Ct | - |
| C-45 | 29438 | + | + | 25.3  | + |
| C-46 | 397   | - | - | No Ct | - |
| C-47 | 483   | - | - | No Ct | - |
| C-48 | 471   | - | - | No Ct | - |

|      |       |   |   |       |   |
|------|-------|---|---|-------|---|
| C-49 | 528   | - | - | No Ct | - |
| C-50 | 419   | - | - | No Ct | - |
| C-51 | 469   | - | - | No Ct | - |
| C-52 | 478   | - | - | No Ct | - |
| C-53 | 460   | - | - | No Ct | - |
| C-54 | 493   | - | - | No Ct | - |
| C-55 | 517   | - | - | No Ct | - |
| B-1  | 521   | - | - | No Ct | - |
| B-2  | 446   | - | - | No Ct | - |
| B-3  | 435   | - | - | No Ct | - |
| B-4  | 471   | - | - | No Ct | - |
| B-5  | 469   | - | - | No Ct | - |
| B-6  | 454   | - | - | No Ct | - |
| B-7  | 422   | - | - | No Ct | - |
| B-8  | 461   | - | - | No Ct | - |
| B-9  | 373   | - | - | No Ct | - |
| B-10 | 361   | - | - | No Ct | - |
| B-11 | 459   | - | - | No Ct | - |
| B-12 | 470   | - | - | No Ct | - |
| B-13 | 488   | - | - | No Ct | - |
| B-14 | 390   | - | - | No Ct | - |
| B-15 | 376   | - | - | No Ct | - |
| B-16 | 468   | - | - | No Ct | - |
| B-17 | 467   | - | - | No Ct | - |
| B-18 | 449   | - | - | No Ct | - |
| B-19 | 504   | - | - | No Ct | - |
| B-20 | 529   | - | - | No Ct | - |
| B-21 | 468   | - | - | No Ct | - |
| B-22 | 441   | - | - | No Ct | - |
| B-23 | 469   | - | - | No Ct | - |
| B-24 | 456   | - | - | No Ct | - |
| B-25 | 15654 | + | + | 28.9  | + |
| B-26 | 387   | - | - | No Ct | - |
| B-27 | 449   | - | - | No Ct | - |
| B-28 | 473   | - | - | No Ct | - |
| B-29 | 491   | - | - | No Ct | - |
| B-30 | 392   | - | - | No Ct | - |
| B-31 | 387   | - | - | No Ct | - |
| B-32 | 419   | - | - | No Ct | - |
| B-33 | 497   | - | - | No Ct | - |
| B-34 | 466   | - | - | No Ct | - |
| B-35 | 7610  | + | - | 34.2  | + |
| B-36 | 521   | - | - | No Ct | - |
| B-37 | 492   | - | - | No Ct | - |

|      |     |   |   |       |   |
|------|-----|---|---|-------|---|
| B-38 | 476 | - | - | No Ct | - |
| B-39 | 441 | - | - | No Ct | - |
| B-40 | 459 | - | - | No Ct | - |
| B-41 | 477 | - | - | No Ct | - |
| B-42 | 469 | - | - | No Ct | - |
| B-43 | 483 | - | - | No Ct | - |
| B-44 | 476 | - | - | No Ct | - |
| B-45 | 509 | - | - | No Ct | - |
| B-46 | 446 | - | - | No Ct | - |
| B-47 | 491 | - | - | No Ct | - |
| B-48 | 465 | - | - | No Ct | - |
| B-49 | 444 | - | - | No Ct | - |
| B-50 | 542 | - | - | No Ct | - |
| B-51 | 511 | - | - | No Ct | - |
| B-52 | 468 | - | - | No Ct | - |
| B-53 | 454 | - | - | No Ct | - |
| B-54 | 392 | - | - | No Ct | - |
| B-55 | 447 | - | - | No Ct | - |
| B-56 | 497 | - | - | No Ct | - |
| B-57 | 539 | - | - | No Ct | - |
| B-58 | 423 | - | - | No Ct | - |
| B-59 | 498 | - | - | No Ct | - |
| B-60 | 438 | - | - | No Ct | - |

---

P-1 ~ P-35: 35 samples of processed meat products, C-1 ~ C-55: 55 samples of cold seasoned vegetable dishes, B-1 ~ B-60: 60 samples of bottled water; LFTS method: lateral flow test strip method.
